# Supplementary material for: Evolution of MALDI-TOF MS Profiles From Lice and Fleas Preserved in Alcohol Over Time
Source: Preprints.org preprint supplement (doi:10.20944/preprints202305.0208.v1), 2023-05-04
Supplement: Supplementary file 3 [file Supplementary Table S1.docx]

**Supplementary Table S1**. List of the arthropod species present in our homemade MALDI-TOF MS database.

| **Arthropod and mode of preservation** | **Body part** | **Species present in our reference database** |
| --- | --- | --- |
| **Fresh or frozen ticks** | Legs | *Amblyomma variegatum*, *Rhipicephalus sanguineus* s.l, *Rhipicephalus bursa*, *Rhipicephalus pulchellus*, *Rhipicephalus sulcatus*, *Hyalomma marginatum rufipes*, *Hyalomma marginatum marginatum*, *Hyalomma impeltatum*, *Hyalomma aegyptium*, *Ixodes ricinus*, *Ixodes persulcatus*, *Dermacentor marginatus*, *Dermacentor reticulatus*, *Dermacentor silvarum*, *Haemaphysalis leachi*, *Haemaphysalis concinna*, *Haemaphysalis japanica*, *Haemaphysalis parva*, *Haemaphysalis punctata*, *Argas persicus*, *Argas lagenoplatis* and *Ornithodoros savignyi* |
| **Ticks stored in alcohol** | Legs | *Am. variegatum*, *Amblyomma gemma*, *Amblyomma cohaerens*, *Amblyomma compressum*, *Amblyomma exornatum*, *A. persicus*, *Haemaphysalis inermis*, *Hae. leachi*, *Hae. paraleachi, Hae muhsamae, Hyalomma anatolicum anatolicum*, *Hyalomma detricum*, *Hyalomma dromedarii*, *Hyalomma excavatum*, *Hy*. *truncatum*, *Hy. m. rufipes*, *Hyalomma aegyptium*, *Ixodes cumulatimpunctatus*, *Ixodes hexagonus*, *I. ricinus*, *Ornithodoros sonrai*, *Rhipicephalus annulatus*, *Rhipicephalus Boophilus decoloratus*, *Rhipicephalus Boophilus microplus*, *Rhipicephalus bergeoni*, *Rh. bursa*, *Rhipicephalus complanatus*, *Rhipicephalus congolensis*, *Rhipicephalus* evertsi *evertsi, Rhipicephalus lunulatus,* *Rhipicephalus* *praetextatus*, *Rh*. *pulchellus*, *Rhipicephalus pusillus* and *Rh. sanguineus* s.l |
| **Ticks infected by bacteria** | Legs | *D. marginatus* infected with *Rickettsia slovaca*, *Rh. sanguineus* infected with *Rickettsia conorii and Rickettsia massiliae* |
| **Mosquito imagos** | Legs | *Aedes aegypti*, *Aedes albopictus*, *Aedes altermans*, *Aedes australis*, *Aedes caspuis*, *Aedes cinereus, Aedes difouri*, *Aedes flavifrons*, *Aedes flowri*, *Aedes multiplex*, *Aedes polynesiensis*, *Aedes vexans*, *Aedes vigilax*, *Aedes excrucians*, *Anopheles arabiensis*, *Anopheles coustani*, *Anopheles claviger*, *Anopheles coluzzii*, *Anopheles funestus*, *Anopheles gambiae*, *Anopheles hyrcanus*,*Anopheles maculipennis*, *Anopheles pharoensis*, *Anopheles rufipes*, *Anopheles wellcomei*, *Anopheles ziemanni*, *Culex annulirostris*, *Culex australicus*, *Culex insigni*, *Culex modestus*, *Culex neavei*, *Culex orbostiensis*, *Culex pipiens*, *Culex quinquefasciatus*, *Culex rima*, *Culex sitiens*, *Culex watti*, *Culiseta longiareolata*, *Lutzia tigripes*, *Mansonia africana*, *Mansonia uniformis*, *Ochlerotatus excrusians*, *Ochlerotatus rusticus*, *Orthopodomyia reunionensis and Verralina funereal* |
| **Mosquitoes aquatic stages** | Whole | *Ae. Aegypti*, *Ae. Albopictus*, *An.* *Gambiae*, *culex hortensis*, *Cx. Modestus*, *Cx. Pipiens*, *Cu. Longiareolata* and *Ochlerotatus caspuis* |
| **Fresh or frozen lice** | Cephalo-thorax | *Damalinia bovis*, *Damalinia caprae*, *Damalinia ovis*, *Goniodes gigas*, *Goniocotes gallinae*, *Gonoides meleagridis*, *Haematopinus eurysternus*, *Linognatus africanus*, *Linognatus* *vituli*, *Lipeurus caponis*, *Menacanthus stramineus*, *Menopon gallinae*, *Pediculus humanus corporis* and *Solenopotes capillatus* |
| **Lice stored in alcohol** | Cephalo-thorax | *Bovicola caprae*, *G. gallina*e, *G. gigas*, *Goniodes dissimilis*, *H. eurysternus*, *H. suis*, *Menacanthus stramineus*, *L.* *vituli*, *M. gallinae* and *P. humanus corporis* |
| **Frozen fleas** | Cephalo-thorax | *Xenopsylla cheopis* and *Ctenocephalides felis* |
| **Fleas stored in alcohol** | Cephalo-thorax | *Archaeopsylla erinacei*, *C. felis*, *Ctenocephalides canis*, *X. cheopis*, *Leptopsylla taschenbergi*, *Nosopsyllus fasciatus*, *Pulex irritans* and *Stenoponia tripectinata* |
| **Fresh bedbugs** | Head | *Cimex lectularius*, *Cimex hemipterus and Cimex (oeciacus) hirundinis* |
| **Dry Triatominae** | Legs | *Eratyrus mucronatus*, *Panstrongylus geniculatus*, *Rhodnius prolixus*, *Rhodnius pictipes*, *Rhodnius robustus* and *Triatoma, infestan* |
| **Fresh Triatominae** | Legs | *Rhodnius robustus* and *Triatoma infestan* |
| **Sand flies** | Cephalo-thorax | *Phlebotomus papatasi*, *Phlebotomus longicuspis*, *Phlebotomus perﬁliewi*, *Phlebotomus perniciosus*, *Phlebotomus sergenti* and *Sergentomyia minuta* |
| **Mites** | Cephalo-thorax | *Leptotrombidium chiangraiensis*, *Leptotrombidium imphalum*, *Leptotrombidium deliense* and *Dermanyssus gallinae* |
| **Termitidea** | Legs | *Amitermes evuncifer*, *Ancistrotermes cavithorax*, *Cubitermes orthognatus*, *Kallotermes flavicollis*, *Macrotermes belicosus*, *Macrotermes herus*, *Macrotermes ivorensis*, *Macrotermes subyalinus*, *Microcerotermes parvu*, *Odontotermes latericuis*, *Procubitermes sjostdie*, *Promirotermes holmegrinie*, *Reticulitermes lucifugus, Trinervitermes geminatus, Trinervitermes occidentalis and Trinevitermes trinervis* |
| **Fresh Blattidae** | Legs | *Supella longipalpa*, *Periplaneta americana*, *Blatta orientalis*, *Blatella germanica*, *and Blaptica dubia*, |
| **Mosquito blood meals** | Abdomen of engorged mosquitoes | *An. gambiae Giles fed on Homo sapiens*, *Equus caballus, Ovis aries*, *rabbit, Balb/C. mouse*, *Rattus norvegicus*, *Canis, familiaris*, *Bos taurus*, *Capra hircus*, *Gallus gallus*, *Equus asinus*, *Tapirus indicus*, *Tapirus terrestris*, *Carollia perspicillata*, *Thraupis episcopus*, *Erythrocebus patas and Callithrix pygmaea blood*, *Ae. albopictus fed on Homo sapiens blood* |
